# Supplementary material for: Transcriptionally Repressive Chromatin Remodelling and CpG Methylation in the Presence of Expanded CTG-Repeats at the DM1 Locus
Source: J Nucleic Acids. 2013 Dec 23;2013:567435. doi: 10.1155/2013/567435 (PMC3884603; doi:10.1155/2013/567435)
Supplement: Supplementary file 1 — This supplementary material consists of three tables with details of the statistical analyses of the chromatin immunoprecipitation (ChIP) experiments and expression analyses. For the ChIP experiment, supplementary table 1 shows median enrichment values of each IgG-abChIP pair (corrected for the positive control value) and the U-statistic and P-value of the Mann-Whitney test that was performed to test if abChIP differed significantly from IgG. Table 2 gives all values for median enrichment and interquartile range (25th and 75th percentile), which were subjected to the Jonckheere-Terpstra test for trend. Z-score and P-values of this test for trend are given in supplementary table 2 as well. Supplementary table 3 gives the median values and interquartile range of relative abundance of transcripts of interest, and the details on the Jonckheere-Terpstra test for trend that was performed on the expression data. [file 567435.f1.xlsx]

## Sheet: Supplementary table 1
	Supplementary table 1
			DM20				DM300				DMSXL
	Antibody used for ChIP		median enrichment		Mann Whitney test		median enrichment		Mann Whitney test		median enrichment		Mann Whitney test
		qPCR amplicon	IgG	specific abChIP	U statistic	P-value	IgG	specific abChIP	U statistic	P-value	IgG	specific abChIP	U statistic	P-value
	CTCF	neg.ctrl: Gapdh	0.1491	0.4069	5	0.04	0.0969	0.3087	5	0.0411	0.08584	0.2085	9	0.1797
		pos.ctrl: Myc	0.4214	1	6	0.0493	0.3638	1	0	0.0028	0.03214	1	6	0.0493
		CTCFbs1	0.3052	1.1	5	0.0411	0.2702	1.316	5	0.0411	0.3426	0.8947	1	0.0043
		CTCFbs2	0.4754	0.7467	6	0.0649	0.3714	0.7507	6	0.0649	0.4072	0.7956	4	0.026
		Enhancer region	0.2119	0.3469	8	0.132	0.2523	0.299	13	0.4848	0.472	0.29	9	0.1797
	H3KAc	neg.ctrl: Amylase	0.07108	0.2034	4	0.007	0.2266	0.1813	21	0.71	0.0749	0.2206	13	0.1649
		pos.ctrl: Gapdh	0.01751	1	0	0.0011	0.007115	1	0	0.0011	0.02709	1	0	0.0011
		CTCFbs1	0.02653	1.43	0	0.0006	0.05008	0.9385	0	0.0006	0.05819	0.2823	0	0.0006
		CTCFbs2	0.09888	2.399	0	0.0006	0.1161	1.583	0	0.0006	0.08981	0.9415	0	0.0006
		Enhancer region	0.02573	0.5826	0	0.0006	0.02704	0.435	0	0.0006	0.03377	0.4541	0	0.0006
	H3K27Me3	neg.ctrl: Gapdh	0.0006434	0.058	0	0.0011	0.0003622	0.032	0	0.0011	0.0004947	0.054	0	0.0022
		pos.ctrl: HOXd9	0.00118	1	0	0.0011	0.0007845	1	0	0.0011	0.001609	1	0	0.0028
		CTCFbs1	0.00118	0.185	0	0.0006	0.00298	0.205	0	0.0006	0.002033	0.2915	0	0.0022
		CTCFbs2	0.002467	0.2085	0	0.0006	0.004738	0.131	0	0.0006	0.002415	0.2375	0	0.0022
		Enhancer region	0.002076	0.087	0	0.0006	0.001537	0.059	0	0.0006	0.001379	0.097	0	0.0022
	H3K9Me3	neg.ctrl: Gapdh	0.07499	0.2061	6	0.0649	0.1221	0.142	18	0.4577	0.1293	0.1959	12	0.3939
		pos.ctrl: HOXd9	0.6332	1	0	0.0028	0.5379	1	0	0.0011	0.4489	1	0	0.0028
		CTCFbs1	0.5236	0.5924	13	0.4848	0.4649	1.096	10	0.0728	0.419	1.788	0	0.0022
		CTCFbs2	0.8088	0.8831	14	0.5887	0.9887	1.321	16	0.3176	0.708	1.596	1	0.0043
		Enhancer region	0.3851	0.437	13	0.4848	0.3344	0.3553	15	0.2593	0.2264	0.463	9	0.1797
	PCNA	pos.ctrl: Amylase	0.4601	1	0	0.0011	0.2385	1	0	0.0011	0.2368	1	0	0.0004
		CTCFbs1	0.3797	0.503	16	0.3176	0.306	0.7448	6	0.0175	0.2481	0.6	5	0.003
		CTCFbs2	0.2989	0.6893	19	0.535	0.5411	0.09621	8	0.0379	0.3711	0.7122	2	0.0006
		Enhancer region	0.2484	0.606	18	0.4557	0.2845	0.4059	5	0.0211	0.1564	0.4397	14	0.065
	Supplementary table 1
	Corrected enrichment values of each IgG-abChIP pair were subjected to Mann-Whitney test to verify if they were statistically significantly different. For each analysis,
	the Mann-Whitney U statistic and thee accompanying P-value are given. The U statistic indicates the number of all possible pairs of observations comprising one from
	each group (IgG or specific abChIP) for which IgG < specific abChIP.
	A summary of this data is given in the respective bar charts (figures 3 for CTCF, 4 for histone modifications and 6 for PCNA).

## Sheet: Supplementary table 2
Supplementary table 2
		DM20			DM300			DMSXL			Jonckheere-Terpstra test for trend
Antibody used for ChIP			percentiles			percentiles			percentiles
	qPCR amplicon	median	25th	75th	median	25th	75th	median	25th	75th	z-score	P-value
CTCF	neg.ctrl: Gapdh	0.407	0.21	0.462	0.309	0.184	0.405	0.209	0.191	0.395	-0.97	0.332
	pos.ctrl: Myc	1	1	1	1	1	1	1	1	1	0	1
	CTCFbs1	0.11	0.97	1.55	1.22	1.02	1.41	0.895	0.73	1.18	-1.254	0.21
	CTCFbs2	0.747	0.684	0.965	0.751	0.715	0.762	0.796	0.671	0.821	0.162	0.872
	Enhancer region	0.347	0.244	0.422	0.299	0.258	0.588	0.291	0.242	0.597	0.081	0.936
H3KAc	neg.ctrl: Amylase	0.203	0.12	0.383	0.181	0.08	0.636	0.221	0.069	0.337	-0.612	0.541
	pos.ctrl: Gapdh	1	1	1	1	1	1	1	1	1	0	1
	CTCFbs1	1.43	1.295	1.553	0.938	0.79	2.234	0.282	0.122	0.593	-2.931	0.003
	CTCFbs2	2.399	2.023	3.022	1.583	1.236	1.98	0.942	0.872	1.736	-2.996	0.003
	Enhancer region	0.583	0.497	0.69	0.435	0.408	0.564	0.454	0.391	0.674	-1.127	0.26
H3K27Me3	neg.ctrl: Gapdh	0.058	0.031	0.07	0.032	0.022	0.06	0.054	0.038	0.091	0.347	0.729
	pos.ctrl: HOXd9	1	1	1	1	1	1	1	1	1	0	1
	CTCFbs1	0.175	0.061	0.212	0.205	0.108	0.349	0.292	0.158	0.526	1.628	0.103
	CTCFbs2	0.208	0.085	0.277	0.131	0.084	0.436	0.238	0.139	0.402	0.728	0.467
	Enhancer region	0.087	0.06	0.143	0.059	0.045	0.134	0.097	0.054	0.134	-0.555	0.579
H3K9Me3	neg.ctrl: Gapdh	0.206	0.128	0.281	0.142	0.109	0.208	0.212	0.138	0.259	0	1
	pos.ctrl: HOXd9	1	1	1	1	1	1	1	1	1	0	1
	CTCFbs1	0.593	0.516	0.743	1.096	0.347	1.939	1.891	1.556	2.443	3.084	0.002
	CTCFbs2	0.883	0.835	0.932	1.321	1.048	1.475	1.552	1.277	1.754	2.599	0.009
	Enhancer region	0.437	0.302	0.575	0.355	0.324	1.364	0.507	0.409	1.017	0.728	0.467
PCNA	pos.ctrl: Amylase	1	1	1	1	1	1	1	1	1	0	1
	CTCFbs1	0.503	0.361	0.776	0.745	0.444	0.821	0.6	0.483	1.055	0.662	0.508
	CTCFbs2	0.689	0.586	0.788	0.962	0.867	1.368	0.712	0.583	1.009	0.331	0.741
	Enhancer region	0.606	0.242	0.694	0.406	0.369	0.497	0.44	0.244	0.574	-0.482	0.63
Supplementary table 2
Positive-control corrected enrichment values in abChIP reactions were subjected to the Jonckheere-Terpstra test, which tests for the presence
of a statistically significant trend across ordered categories, in our case across increasing CTG-repeat lengths.
The z-score reflects the mean J-T test statistic subtracted from the observed J-T test statistic, the result of which is then divided by the standard
deviation of the J-T test statistic (this was done automatically in SPSS version 20). If the z-score has a positive value, it indicates an ascending
trend, thus increasing enrichment with higher CTG-repeat length, whereas a negative value indicates the opposite, namely descending median
enrichment seen with increasing CTG-repeat length.
Medians and 25th and 75th percentiles are given, which correspond to the bar charts shown in figure 3 (CTCF), 4 (histone modifications) and 6
(PCNA). Since three groups are compared in each analysis, there are 2 degrees of freedom.

## Sheet: Supplementary table 3
Supplementary table 3
		DM20			DM300			DMSXL			Jonckheere-Terpstra test for trend
Target gene			percentiles			percentiles			percentiles
	Reference gene	median	25th	75th	median	25th	75th	median	25th	75th	z-score	P-value
DMPK sense	18s	7.207	6.049	8.765	1.107	1.049	1.281	1.259	1.078	1.336	-3.16	0.002
	Gapdh	4.573	4.389	4.709	0.906	0.725	0.946	0.914	0.808	0.969	-3.0857	0.002
	Dmpk	5.267	4.921	5.708	1.05	0.89	1.114	1.253	1.154	1.353	-2.332	0.02
DMPK antisense	18s	1.853	1.527	1.986	1.367	1.355	2.14	1.311	1.085	1.481	-2.107	0.035
	Gapdh	0.992	0.921	1.356	1.16	1.028	1.265	1.016	0.727	1.297	-0.15	0.88
	Dmpk	1.318	1.183	1.599	1.289	1.215	1.595	1.501	0.983	1.974	0	1
SIX5	18s	1.754	1.348	2.121	1.13	1.115	1.469	1.159	0.879	1.354	-2.332	0.02
	Gapdh	1.619	1.178	2.032	1.13	0.989	1.387	1.082	0.827	1.428	-1.956	0.05
	Dmpk	1.596	1.561	1.945	1.218	1.192	1.306	1.11	1.007	1.142	-3.912	<0,001
Supplementary table 3
Relative abundance of transcripts of interest (normalised against one of three reference genes) were subjected to the Jonckheere-Terpstra test,
which tests for the presence of a statistically significant trend across ordered categories, in our case across increasing CTG-repeat lengths.
The z-score reflects the mean J-T test statistic subtracted from the observed J-T test statistic, the result of which is then divided by the standard
deviation of the J-T test statistic (this was done automatically in SPSS version 20). If the z-score has a positive value, it indicates an ascending
trend, thus increasing transcript levels with higher CTG-repeat length, whereas a negative value indicates a descending median
transcript levels seen with increasing CTG-repeat length.
Medians and 25th and 75th percentiles are given, which correspond to the bar charts shown in figure 5.
Since three groups are compared in each analysis, there are 2 degrees of freedom.
